# Supplementary material for: Do people with symptoms of an infectious illness follow advice to stay at home? Evidence from a series of cross-sectional surveys about presenteeism in the UK
Source: HighWire-hosted journal article supplement (doi:10.1136/bmjopen-2021-060511), 2022-05-01
Supplement: bmjopen-2021-060511supp001_data_supplement.pdf [file bmjopen-2021-060511supp001_data_supplement.pdf]

## SUPPLEMENTARY MATERIALS

Table 1. Socio-demographic characteristics associated with leaving home for different reasons while symptomatic.

| Attribute                    | Level                                                    | Been out to...<br>the shops for<br>groceries/pharmacy <sup>a</sup> |          | the shops for things other than<br>groceries/pharmacy <sup>b</sup> |          | go to work <sup>c</sup>         |          | meet friends or family that you<br>don't live with <sup>d</sup> |          | provide help or care for a<br>vulnerable person <sup>e</sup> |          |
|------------------------------|----------------------------------------------------------|--------------------------------------------------------------------|----------|--------------------------------------------------------------------|----------|---------------------------------|----------|-----------------------------------------------------------------|----------|--------------------------------------------------------------|----------|
|                              |                                                          | aOR for going out<br>(95% CI) †                                    | <i>p</i> | aOR for going out<br>(95% CI) †                                    | <i>p</i> | aOR for going out<br>(95% CI) † | <i>p</i> | aOR for going out<br>(95% CI) †                                 | <i>p</i> | aOR for going out<br>(95% CI) †                              | <i>p</i> |
| Survey wave in<br>timepoint  | 20 to 22 September 2021 (wave 58)                        | Ref                                                                | -        | Ref                                                                | -        | Ref                             | -        | Ref                                                             | -        | Ref                                                          | -        |
|                              | 4 to 6 October 2021 (wave 59)                            | 0.47 (0.26 to 0.84)                                                | 0.01     | 0.39 (0.22 to 0.70)                                                | 0.001*   | 0.44 (0.21 to 0.90)             | 0.02     | 0.48 (0.27 to 0.86)                                             | 0.01     | 0.43 (0.24 to 0.79)                                          | 0.007    |
|                              | 18 to 20 October 2021 (wave 60)                          | 0.37 (0.21 to 0.68)                                                | 0.001*   | 0.41 (0.23 to 0.75)                                                | 0.003    | 0.32 (0.16 to 0.65)             | 0.002*   | 0.37 (0.21 to 0.67)                                             | 0.001*   | 0.35 (0.18 to 0.65)                                          | 0.001*   |
|                              | 1 to 4 November 2021 (wave 61)                           | 0.55 (0.30 to 1.00)                                                | 0.05     | 0.52 (0.29 to 0.93)                                                | 0.03     | 0.33 (0.16 to 0.69)             | 0.003    | 0.41 (0.23 to 0.73)                                             | 0.002*   | 0.32 (0.17 to 0.61)                                          | 0.001*   |
|                              | Overall                                                  | $\chi^2(3)=11.3$                                                   | 0.01     | $\chi^2(3)=12.4$                                                   | 0.006    | $\chi^2(3)=12.3$                | 0.006    | $\chi^2(3)=13.4$                                                | 0.004    | $\chi^2(3)=16.0$                                             | 0.001*   |
| Region                       | North (North West, North East, Yorkshire and the Humber) | Ref                                                                | -        | Ref                                                                | -        | Ref                             | -        | Ref                                                             | -        | Ref                                                          | -        |
|                              | Midlands (East Midlands, West Midlands, East of England) | 0.89 (0.50 to 1.58)                                                | 0.69     | 0.97 (0.54 to 1.75)                                                | 0.93     | 0.93 (0.45 to 1.92)             | 0.84     | 0.75 (0.42 to 1.34)                                             | 0.34     | 0.59 (0.31 to 1.13)                                          | 0.11     |
|                              | London                                                   | 1.33 (0.68 to 2.61)                                                | 0.40     | 1.51 (0.77 to 2.95)                                                | 0.23     | 1.71 (0.74 to 3.97)             | 0.21     | 1.19 (0.62 to 2.29)                                             | 0.61     | 0.75 (0.37 to 1.53)                                          | 0.43     |
|                              | South (South East, South West)                           | 1.54 (0.81 to 2.92)                                                | 0.18     | 1.21 (0.64 to 2.28)                                                | 0.55     | 1.79 (0.82 to 3.91)             | 0.14     | 0.92 (0.49 to 1.72)                                             | 0.80     | 1.02 (0.51 to 2.01)                                          | 0.96     |
|                              | Scotland, Wales, Northern Ireland                        | 0.78 (0.41 to 1.49)                                                | 0.46     | 0.67 (0.34 to 1.30)                                                | 0.23     | 0.74 (0.32 to 1.70)             | 0.47     | 0.62 (0.32 to 1.20)                                             | 0.16     | 0.38 (0.17 to 0.83)                                          | 0.01     |
|                              | Overall                                                  | $\chi^2(4)=5.4$                                                    | 0.25     | $\chi^2(4)=5.2$                                                    | 0.26     | $\chi^2(4)=6.7$                 | 0.15     | $\chi^2(4)=4.3$                                                 | 0.37     | $\chi^2(4)=8.4$                                              | 0.08     |
|                              | Gender                                                   | Male                                                               | Ref      | -                                                                  | Ref      | -                               | Ref      | -                                                               | Ref      | -                                                            | Ref      |
|                              | Female                                                   | 0.78 (0.52 to 1.17)                                                | 0.22     | 0.75 (0.49 to 1.13)                                                | 0.16     | 0.55 (0.33 to 0.93)             | 0.03     | 1.09 (0.73 to 1.65)                                             | 0.67     | 0.67 (0.43 to 1.07)                                          | 0.09     |
| Age (per decade)             | Raw age                                                  | 1.00 (0.98 to 1.02)                                                | 0.65     | 0.99 (0.97 to 1.01)                                                | 0.30     | 0.96 (0.94 to 0.99)             | 0.01     | 0.98 (0.96 to 1.00)                                             | 0.04     | 0.97 (0.95 to 0.99)                                          | 0.01     |
|                              | Age: quadratic (age-mean) <sup>2</sup>                   | 1.0001 (0.9996 to 1.0007)                                          | 0.65     | 1.0005 (0.9998 to 1.0012)                                          | 0.14     | 1.0011 (0.9998 to 1.0024)       | 0.11     | 1.0005 (0.9999 to 1.0011)                                       | 0.09     | 1.0004 (0.9998 to 1.001)                                     | 0.16     |
| Dependent child in household | None                                                     | Ref                                                                | -        | Ref                                                                | -        | Ref                             | -        | Ref                                                             | -        | Ref                                                          | -        |
|                              | Child present                                            | 1.20 (0.76 to 1.90)                                                | 0.43     | 1.78 (1.11 to 2.84)                                                | 0.02     | 2.50 (1.38 to 4.52)             | 0.003    | 1.64 (1.03 to 2.59)                                             | 0.04     | 2.85 (1.70 to 4.78)                                          | <0.001*  |
| Employment status            | Not employed                                             | Ref                                                                | -        | Ref                                                                | -        | Ref                             | -        | Ref                                                             | -        | Ref                                                          | -        |
|                              | Employed, can work from home all the time                | 1.39 (0.81 to 2.39)                                                | 0.23     | 1.51 (0.87 to 2.63)                                                | 0.14     | Ref                             | -        | 1.41 (0.83 to 2.42)                                             | 0.21     | 1.70 (0.93 to 3.12)                                          | 0.08     |
|                              | Employed, cannot work from home all the time             | 1.00 (0.60 to 1.65)                                                | 0.99     | 1.24 (0.73 to 2.09)                                                | 0.43     | 1.26 (0.75 to 2.09)             | 0.38     | 0.80 (0.48 to 1.34)                                             | 0.40     | 1.39 (0.77 to 2.51)                                          | 0.27     |
|                              | Overall                                                  | $\chi^2(2)=2.2$                                                    | 0.33     | $\chi^2(2)=2.2$                                                    | 0.34     | -                               | -        | $\chi^2(2)=5.5$                                                 | 0.06     | $\chi^2(2)=3.0$                                              | 0.22     |
| Socio-economic grade ‡       | ABC1                                                     | Ref                                                                | -        | Ref                                                                | -        | Ref                             | -        | Ref                                                             | -        | Ref                                                          | -        |
|                              | C2DE                                                     | 1.06 (0.71 to 1.59)                                                | 0.77     | 1.08 (0.72 to 1.63)                                                | 0.71     | 1.84 (1.10 to 3.07)             | 0.02     | 1.44 (0.96 to 2.17)                                             | 0.08     | 1.27 (0.81 to 1.99)                                          | 0.31     |
| Financial hardship           | Range 3 (least) to 15 (most)                             | 0.98 (0.91 to 1.05)                                                | 0.50     | 0.91 (0.85 to 0.98)                                                | 0.01     | 0.92 (0.85 to 1.00)             | 0.05     | 0.97 (0.91 to 1.05)                                             | 0.48     | 0.86 (0.79 to 0.94)                                          | <0.001*  |
| Ethnicity                    | White British                                            | Ref                                                                | -        | Ref                                                                | -        | Ref                             | -        | Ref                                                             | -        | Ref                                                          | -        |
|                              | White other                                              | 0.99 (0.42 to 2.35)                                                | 0.98     | 1.30 (0.54 to 3.11)                                                | 0.55     | 0.81 (0.30 to 2.22)             | 0.69     | 0.76 (0.32 to 1.80)                                             | 0.53     | 1.57 (0.63 to 3.91)                                          | 0.33     |
|                              | Black and minority ethnicity                             | 1.03 (0.57 to 1.85)                                                | 0.92     | 1.04 (0.58 to 1.86)                                                | 0.90     | 0.65 (0.33 to 1.31)             | 0.23     | 1.04 (0.58 to 1.84)                                             | 0.90     | 1.48 (0.81 to 2.72)                                          | 0.21     |
|                              | Overall                                                  | $\chi^2(2)=0.0$                                                    | 0.99     | $\chi^2(2)=0.4$                                                    | 0.84     | $\chi^2(2)=1.4$                 | 0.49     | $\chi^2(2)=0.5$                                                 | 0.78     | $\chi^2(2)=1.9$                                              | 0.38     |
| First language               | Not English                                              | Ref                                                                | -        | Ref                                                                | -        | Ref                             | -        | Ref                                                             | -        | Ref                                                          | -        |
|                              | English                                                  | 1.20 (0.65 to 2.19)                                                | 0.56     | 1.37 (0.75 to 2.52)                                                | 0.31     | 1.15 (0.55 to 2.40)             | 0.70     | 1.13 (0.62 to 2.07)                                             | 0.69     | 0.95 (0.50 to 1.79)                                          | 0.87     |

|                    |                  |                     |      |                     |      |                     |      |                     |      |                     |      |
|--------------------|------------------|---------------------|------|---------------------|------|---------------------|------|---------------------|------|---------------------|------|
| Living alone       | Not living alone | Ref                 | -    | Ref                 | -    | Ref                 | -    | Ref                 | -    | Ref                 | -    |
|                    | Living alone     | 0.80 (0.43 to 1.49) | 0.49 | 0.75 (0.39 to 1.44) | 0.39 | 0.70 (0.31 to 1.59) | 0.40 | 1.06 (0.57 to 1.99) | 0.85 | 0.67 (0.30 to 1.49) | 0.32 |
| Vaccination status | Not vaccinated   | Ref                 | -    | Ref                 | -    | Ref                 | -    | Ref                 | -    | Ref                 | -    |
|                    | 1 dose           | 1.29 (0.65 to 2.54) | 0.47 | 1.06 (0.55 to 2.06) | 0.86 | 1.87 (0.81 to 4.32) | 0.14 | 1.35 (0.70 to 2.61) | 0.37 | 1.37 (0.69 to 2.70) | 0.37 |
|                    | 2 doses or more  | 0.90 (0.54 to 1.49) | 0.68 | 0.77 (0.46 to 1.28) | 0.31 | 1.17 (0.63 to 2.17) | 0.63 | 0.75 (0.46 to 1.24) | 0.26 | 0.78 (0.46 to 1.34) | 0.37 |
|                    | Overall          | $\chi^2(2)=1.2$     | 0.54 | $\chi^2(2)=1.5$     | 0.47 | $\chi^2(2)=2.2$     | 0.34 | $\chi^2(2)=3.7$     | 0.16 | $\chi^2(2)=2.9$     | 0.23 |
| Ever had COVID-19  | Think not        | Ref                 | -    | Ref                 | -    | Ref                 | -    | Ref                 | -    | Ref                 | -    |
|                    | Think yes        | 1.33 (0.88 to 2.01) | 0.17 | 1.68 (1.11 to 2.55) | 0.01 | 1.50 (0.91 to 2.49) | 0.11 | 1.19 (0.79 to 1.79) | 0.41 | 1.19 (0.76 to 1.86) | 0.46 |

A) n=462 (92.8% valid responses). B) n=462 (92.8% valid responses). C) n=337 (94.7% valid responses). D) n=462 (92.8% valid responses). E) n=462 (92.8% valid responses).

† Adjusting for all other socio-demographic characteristics.

\*  $p \leq .002$
